# Supplementary material
Source: publisher figshare collection journal article supplement (https://acs.figshare.com/ndownloader/files/5087488)
Supplement: Supplementary file 1 [file 5087488]

data_1 
 
_audit_creation_method            SHELXL-97 
_chemical_name_systematic 
; 
 ? 
; 
_chemical_name_common             ? 
_chemical_formula_moiety          ? 
_chemical_formula_sum 
 'C41 H24 Cl2 F6 O4' 
_chemical_formula_weight          765.50 
 
loop_ 
 _atom_type_symbol 
 _atom_type_description 
 _atom_type_scat_dispersion_real 
 _atom_type_scat_dispersion_imag 
 _atom_type_scat_source 
 'C'  'C'   0.0033   0.0016 
 'International Tables Vol C Tables 4.2.6.8 and 6.1.1.4' 
 'H'  'H'   0.0000   0.0000 
 'International Tables Vol C Tables 4.2.6.8 and 6.1.1.4' 
 'N'  'N'   0.0061   0.0033 
 'International Tables Vol C Tables 4.2.6.8 and 6.1.1.4' 
 'O'  'O'   0.0106   0.0060 
 'International Tables Vol C Tables 4.2.6.8 and 6.1.1.4' 
 'Cl'  'Cl'   0.1484   0.1585 
 'International Tables Vol C Tables 4.2.6.8 and 6.1.1.4' 
 'F'  'F'   0.0171   0.0103 
 'International Tables Vol C Tables 4.2.6.8 and 6.1.1.4' 
 
_symmetry_cell_setting            monoclinic
_symmetry_space_group_name_H-M    C2/c
 
loop_ 
 _symmetry_equiv_pos_as_xyz 
 'x, y, z' 
 '-x, y+1/2, -z+1/2' 
 'x+1/2, y+1/2, z' 
 '-x+1/2, y+1, -z+1/2' 
 '-x, -y, -z' 
 'x, -y-1/2, z-1/2' 
 '-x+1/2, -y+1/2, -z' 
 'x+1/2, -y, z-1/2' 
 
_cell_length_a                    28.15(4) 
_cell_length_b                    7.284(12) 
_cell_length_c                    18.04(3) 
_cell_angle_alpha                 90.00 
_cell_angle_beta                  113.028(10) 
_cell_angle_gamma                 90.00 
_cell_volume                      3404(8) 
_cell_formula_units_Z             4 
_cell_measurement_temperature     293(2) 
_cell_measurement_reflns_used     ? 
_cell_measurement_theta_min       ? 
_cell_measurement_theta_max       ? 
 
_exptl_crystal_description        ? 
_exptl_crystal_colour             ? 
_exptl_crystal_size_max           ? 
_exptl_crystal_size_mid           ? 
_exptl_crystal_size_min           ? 
_exptl_crystal_density_meas       ? 
_exptl_crystal_density_diffrn     1.494 
_exptl_crystal_density_method     'not measured' 
_exptl_crystal_F_000              1560 
_exptl_absorpt_coefficient_mu     0.268 
_exptl_absorpt_correction_type    none
_exptl_absorpt_correction_T_min   ? 
_exptl_absorpt_correction_T_max   ? 
 
_exptl_special_details 
; 
 ? 
; 
 
_diffrn_ambient_temperature       293(2) 
_diffrn_radiation_wavelength      0.71073 
_diffrn_radiation_type            MoK\a 
_diffrn_radiation_source          'fine-focus sealed tube' 
_diffrn_radiation_monochromator   graphite 
_diffrn_measurement_device        'Marresearch Image Plate'
_diffrn_measurement_method
  '95 frames at 2^o intervals, counting time 2 min.'
_diffrn_detector_area_resol_mean  ? 
_diffrn_standards_number          ? 
_diffrn_standards_interval_count  ? 
_diffrn_standards_interval_time   ? 
_diffrn_standards_decay_%         ? 
_diffrn_reflns_number             9519 
_diffrn_reflns_av_R_equivalents   0.0543 
_diffrn_reflns_av_sigmaI/netI     0.0558 
_diffrn_reflns_limit_h_min        -34 
_diffrn_reflns_limit_h_max        34 
_diffrn_reflns_limit_k_min        -8 
_diffrn_reflns_limit_k_max        8 
_diffrn_reflns_limit_l_min        -20 
_diffrn_reflns_limit_l_max        22 
_diffrn_reflns_theta_min          1.57 
_diffrn_reflns_theta_max          25.81 
_reflns_number_total              3264 
_reflns_number_gt                 2559 
_reflns_threshold_expression      >2sigma(I) 
 
 
_computing_data_collection        'XDS (Kabsch, 1991)'
_computing_cell_refinement        XDS
_computing_data_reduction         XDS
_computing_structure_solution     'SHELXS-86 (Sheldrick, 1990)'
_computing_structure_refinement   'SHELXL-93 (Sheldrick, 1993)'
_computing_molecular_graphics     'PLATON(Spek,1994)'

_refine_special_details 
; 
 Refinement of F^2^ against ALL reflections.  The weighted R-factor wR and 
 goodness of fit S are based on F^2^, conventional R-factors R are based 
 on F, with F set to zero for negative F^2^. The threshold expression of 
 F^2^ > 2sigma(F^2^) is used only for calculating R-factors(gt) etc. and is 
 not relevant to the choice of reflections for refinement.  R-factors based 
 on F^2^ are statistically about twice as large as those based on F, and R- 
 factors based on ALL data will be even larger. 
; 
 
_refine_ls_structure_factor_coef  Fsqd  
_refine_ls_matrix_type            full 
_refine_ls_weighting_scheme 
 'calc w=1/[\s^2^(Fo^2^)+(0.0935P)^2^+7.2961P] where P=(Fo^2^+2Fc^2^)/3' 
_atom_sites_solution_primary      direct 
_atom_sites_solution_secondary    difmap 
_atom_sites_solution_hydrogens    geom 
_refine_ls_hydrogen_treatment     mixed 
_refine_ls_extinction_method      none 
_refine_ls_extinction_coef        ? 
_refine_ls_number_reflns          3264 
_refine_ls_number_parameters      240 
_refine_ls_number_restraints      0 
_refine_ls_R_factor_all           0.1131 
_refine_ls_R_factor_gt            0.0851 
_refine_ls_wR_factor_ref          0.2273 
_refine_ls_wR_factor_gt           0.2027 
_refine_ls_goodness_of_fit_ref    1.220 
_refine_ls_restrained_S_all       1.220 
_refine_ls_shift/su_max           0.007 
_refine_ls_shift/su_mean          0.001 
 
loop_ 
 _atom_site_label 
 _atom_site_type_symbol 
 _atom_site_fract_x 
 _atom_site_fract_y 
 _atom_site_fract_z 
 _atom_site_U_iso_or_equiv 
 _atom_site_adp_type 
 _atom_site_occupancy 
 _atom_site_calc_flag 
 _atom_site_refinement_flags 
 _atom_site_disorder_assembly 
 _atom_site_disorder_group 
Cl1 Cl 0.18744(6) 0.3457(2) 0.40684(10) 0.0812(5) Uani 1 d . . . 
C11 C 0.15272(17) 0.1418(6) 0.3943(3) 0.0483(11) Uani 1 d . . . 
C12 C 0.16931(16) 0.0061(7) 0.4520(3) 0.0485(11) Uani 1 d . . . 
H12 H 0.2002 0.0196 0.4966 0.058 Uiso 1 calc R . . 
C13 C 0.13980(15) -0.1499(6) 0.4433(3) 0.0441(10) Uani 1 d . . . 
H13 H 0.1511 -0.2421 0.4819 0.053 Uiso 1 calc R . . 
C14 C 0.09319(14) -0.1702(6) 0.3770(2) 0.0377(9) Uani 1 d . . . 
C15 C 0.07851(16) -0.0333(6) 0.3184(3) 0.0455(11) Uani 1 d . . . 
H15 H 0.0481 -0.0472 0.2730 0.055 Uiso 1 calc R . . 
C16 C 0.10771(18) 0.1213(7) 0.3259(3) 0.0517(12) Uani 1 d . . . 
H16 H 0.0976 0.2109 0.2860 0.062 Uiso 1 calc R . . 
C17 C 0.05899(15) -0.3341(6) 0.3623(2) 0.0434(10) Uani 1 d . . . 
O18 O 0.03094(13) -0.3738(5) 0.29305(19) 0.0664(10) Uani 1 d . . . 
C21 C 0.05916(13) -0.4538(6) 0.4300(2) 0.0351(9) Uani 1 d . . . 
C22 C 0.04357(15) -0.6373(6) 0.4114(3) 0.0453(11) Uani 1 d . . . 
H22 H 0.0320 -0.6771 0.3583 0.054 Uiso 1 calc R . . 
C23 C 0.04511(16) -0.7593(6) 0.4708(3) 0.0451(11) Uani 1 d . . . 
H23 H 0.0356 -0.8812 0.4582 0.054 Uiso 1 calc R . . 
C24 C 0.06093(14) -0.6982(6) 0.5491(3) 0.0392(10) Uani 1 d . . . 
C25 C 0.07312(15) -0.5154(6) 0.5685(3) 0.0420(10) Uani 1 d . . . 
H25 H 0.0816 -0.4743 0.6210 0.050 Uiso 1 calc R . . 
C26 C 0.07258(15) -0.3945(6) 0.5090(2) 0.0395(10) Uani 1 d . . . 
H26 H 0.0813 -0.2721 0.5219 0.047 Uiso 1 calc R . . 
O27 O 0.06405(11) -0.8225(4) 0.60984(19) 0.0499(8) Uani 1 d . . . 
C31 C 0.11001(14) -0.9183(5) 0.6439(2) 0.0343(9) Uani 1 d . . . 
C32 C 0.15464(14) -0.8715(5) 0.6335(2) 0.0365(9) Uani 1 d . . . 
H32 H 0.1547 -0.7714 0.6016 0.044 Uiso 1 calc R . . 
C33 C 0.19924(14) -0.9736(5) 0.6707(2) 0.0348(9) Uani 1 d . . . 
H33 H 0.2292 -0.9391 0.6641 0.042 Uiso 1 calc R . . 
C34 C 0.20025(13) -1.1259(5) 0.7174(2) 0.0291(8) Uani 1 d . . . 
C35 C 0.15495(14) -1.1710(5) 0.7277(2) 0.0337(9) Uani 1 d . . . 
H35 H 0.1548 -1.2711 0.7596 0.040 Uiso 1 calc R . . 
C36 C 0.11016(15) -1.0684(6) 0.6909(2) 0.0377(9) Uani 1 d . . . 
H36 H 0.0802 -1.1008 0.6980 0.045 Uiso 1 calc R . . 
C37 C 0.2500 -1.2437(7) 0.7500 0.0340(12) Uani 1 d S . . 
C38 C 0.25224(16) -1.3685(6) 0.8211(3) 0.0482(12) Uani 1 d . . . 
F39 F 0.24284(10) -1.2728(4) 0.87741(16) 0.0583(8) Uani 1 d . . . 
>F40 F 0.21810(11) -1.5061(4) 0.7984(2) 0.0684(9) Uani 1 d . . . 
F41 F 0.29902(11) -1.4446(4) 0.8587(2) 0.0724(9) Uani 1 d . . . 
 
loop_ 
 _atom_site_aniso_label 
 _atom_site_aniso_U_11 
 _atom_site_aniso_U_22 
 _atom_site_aniso_U_33 
 _atom_site_aniso_U_23 
 _atom_site_aniso_U_13 
 _atom_site_aniso_U_12 
Cl1 0.0796(10) 0.0648(9) 0.1033(13) 0.0022(8) 0.0402(9) -0.0186(8) 
C11 0.046(2) 0.051(3) 0.057(3) -0.001(2) 0.029(2) -0.002(2) 
C12 0.034(2) 0.071(3) 0.036(2) -0.002(2) 0.0080(18) -0.007(2) 
C13 0.033(2) 0.060(3) 0.036(2) 0.005(2) 0.0093(18) 0.001(2) 
C14 0.0285(19) 0.052(3) 0.033(2) -0.0018(18) 0.0126(17) 0.0060(18) 
C15 0.037(2) 0.058(3) 0.037(2) 0.004(2) 0.0093(18) 0.018(2) 
C16 0.054(3) 0.055(3) 0.052(3) 0.011(2) 0.027(2) 0.014(2) 
C17 0.030(2) 0.061(3) 0.031(2) -0.003(2) 0.0045(17) 0.0021(19) 
O18 0.057(2) 0.088(3) 0.0364(18) -0.0044(17) -0.0006(15) -0.0230(19) 
C21 0.0207(17) 0.046(2) 0.036(2) -0.0055(18) 0.0083(16) 0.0060(16) 
C22 0.035(2) 0.055(3) 0.040(2) -0.015(2) 0.0081(18) 0.0084(19) 
C23 0.036(2) 0.038(2) 0.057(3) -0.004(2) 0.013(2) 0.0080(18) 
C24 0.0250(19) 0.049(2) 0.043(2) 0.004(2) 0.0124(17) 0.0083(18) 
C25 0.033(2) 0.057(3) 0.034(2) -0.006(2) 0.0111(17) 0.0043(19) 
C26 0.036(2) 0.044(2) 0.035(2) -0.0055(19) 0.0104(17) 0.0004(18) 
O27 0.0315(15) 0.0592(19) 0.061(2) 0.0126(16) 0.0202(14) 0.0110(14) 
C31 0.0266(19) 0.039(2) 0.037(2) -0.0056(18) 0.0129(16) 0.0002(16) 
C32 0.033(2) 0.036(2) 0.040(2) 0.0103(18) 0.0131(17) 0.0010(17) 
C33 0.0276(19) 0.039(2) 0.042(2) 0.0014(18) 0.0177(17) -0.0028(16) 
C34 0.0258(18) 0.032(2) 0.0291(19) -0.0049(15) 0.0102(15) -0.0027(15) 
C35 0.035(2) 0.034(2) 0.034(2) 0.0036(16) 0.0155(17) -0.0036(16) 
C36 0.031(2) 0.044(2) 0.042(2) -0.0063(19) 0.0183(17) -0.0079(17) 
C37 0.033(3) 0.032(3) 0.040(3) 0.000 0.018(2) 0.000 
C38 0.037(2) 0.040(2) 0.067(3) 0.013(2) 0.020(2) -0.0008(19) 
F39 0.0600(17) 0.0723(19) 0.0473(16) 0.0172(14) 0.0260(13) 0.0025(14) 
F40 0.0673(18) 0.0397(15) 0.102(2) 0.0173(15) 0.0378(17) -0.0095(13) 
F41 0.0546(17) 0.0674(19) 0.092(2) 0.0459(17) 0.0254(16) 0.0220(14) 
 
_geom_special_details 
; 
 All esds (except the esd in the dihedral angle between two l.s. planes) 
 are estimated using the full covariance matrix.  The cell esds are taken 
 into account individually in the estimation of esds in distances, angles 
 and torsion angles; correlations between esds in cell parameters are only 
 used when they are defined by crystal symmetry.  An approximate (isotropic) 
 treatment of cell esds is used for estimating esds involving l.s. planes. 
; 
 
loop_ 
 _geom_bond_atom_site_label_1 
 _geom_bond_atom_site_label_2 
 _geom_bond_distance 
 _geom_bond_site_symmetry_2 
 _geom_bond_publ_flag 
Cl1 C11 1.743(5) . ? 
C11 C12 1.378(7) . ? 
C11 C16 1.387(7) . ? 
C12 C13 1.380(6) . ? 
C13 C14 1.395(6) . ? 
C14 C15 1.393(6) . ? 
C14 C17 1.491(6) . ? 
C15 C16 1.369(7) . ? 
C17 O18 1.223(5) . ? 
C17 C21 1.499(6) . ? 
C21 C26 1.391(6) . ? 
C21 C22 1.406(6) . ? 
C22 C23 1.379(7) . ? 
C23 C24 1.378(6) . ? 
C24 C25 1.386(7) . ? 
C24 O27 1.397(5) . ? 
C25 C26 1.385(6) . ? 
O27 C31 1.385(5) . ? 
C31 C32 1.383(5) . ? 
C31 C36 1.382(6) . ? 
C32 C33 1.386(5) . ? 
C33 C34 1.386(5) . ? 
C34 C35 1.398(5) . ? 
C34 C37 1.549(5) . ? 
C35 C36 1.391(6) . ? 
C37 C34 1.549(5) 4_546 ? 
C37 C38 1.553(6) 4_546 ? 
C37 C38 1.553(6) . ? 
C38 F40 1.337(5) . ? 
C38 F41 1.343(5) . ? 
C38 F39 1.341(6) . ? 
 
loop_ 
 _geom_angle_atom_site_label_1 
 _geom_angle_atom_site_label_2 
 _geom_angle_atom_site_label_3 
 _geom_angle 
 _geom_angle_site_symmetry_1 
 _geom_angle_site_symmetry_3 
 _geom_angle_publ_flag 
C12 C11 C16 121.1(4) . . ? 
C12 C11 Cl1 120.4(4) . . ? 
C16 C11 Cl1 118.6(4) . . ? 
C13 C12 C11 119.6(4) . . ? 
C12 C13 C14 120.5(4) . . ? 
C15 C14 C13 118.4(4) . . ? 
C15 C14 C17 117.4(4) . . ? 
C13 C14 C17 124.2(4) . . ? 
C16 C15 C14 121.7(4) . . ? 
C15 C16 C11 118.8(4) . . ? 
O18 C17 C14 119.0(4) . . ? 
O18 C17 C21 119.3(4) . . ? 
C14 C17 C21 121.7(3) . . ? 
C26 C21 C22 118.2(4) . . ? 
C26 C21 C17 124.5(4) . . ? 
C22 C21 C17 117.2(4) . . ? 
C23 C22 C21 121.0(4) . . ? 
C24 C23 C22 119.2(4) . . ? 
C23 C24 C25 121.2(4) . . ? 
C23 C24 O27 119.4(4) . . ? 
C25 C24 O27 119.4(4) . . ? 
C24 C25 C26 119.2(4) . . ? 
C25 C26 C21 120.9(4) . . ? 
C31 O27 C24 115.8(3) . . ? 
O27 C31 C32 123.8(4) . . ? 
O27 C31 C36 116.7(3) . . ? 
C32 C31 C36 119.5(3) . . ? 
C33 C32 C31 120.1(4) . . ? 
C32 C33 C34 121.5(3) . . ? 
C33 C34 C35 117.8(3) . . ? 
C33 C34 C37 118.4(3) . . ? 
C35 C34 C37 123.7(3) . . ? 
C36 C35 C34 121.0(4) . . ? 
C31 C36 C35 120.1(3) . . ? 
C34 C37 C34 112.7(4) . 4_546 ? 
C34 C37 C38 105.8(2) . 4_546 ? 
C34 C37 C38 112.1(2) 4_546 4_546 ? 
C34 C37 C38 112.1(2) . . ? 
C34 C37 C38 105.8(2) 4_546 . ? 
C38 C37 C38 108.3(5) 4_546 . ? 
F40 C38 F41 106.9(4) . . ? 
F40 C38 F39 106.9(4) . . ? 
F41 C38 F39 106.1(4) . . ? 
F40 C38 C37 113.2(4) . . ? 
F41 C38 C37 111.9(3) . . ? 
F39 C38 C37 111.4(4) . . ? 
 
_refine_diff_density_max    0.306 
_refine_diff_density_min   -0.304 
_refine_diff_density_rms    0.098 


_publ_section_references

;

Kabsch, W. (1988), J.Appl.Cryst 21 916-932.

Sheldrick, G.M. (1990) SHELX86, Acta Cryst. A46 467-480.

Sheldrick, G.M. (1993) SHELXL program for crystallography refinement.
University of Gottingen, Germany.

Spek, A.L., (1994) PLATON-94 program, Utrecht University, The Netherlands


;


#====END


7
	
